# Supplementary material for: Ab initio and density functional study of structure and bonding of cage compounds containing boron, phosphorus and group 14 atomsElectronic supplementary information (ESI) available: optimized bond lengths and angles. See http://www.rsc.org/suppdata/nj/b3/b301191g/
Source: Royal Society of Chemistry journal article supplement (doi:10.1039/b301191g), 2003-01-01
Supplement: b301191g.pdf [file b301191g.pdf]

---

***Ab initio* and density functional study of structure and bonding of cage compounds containing Boron, Phosphorous and group 14 atoms**

---

**Sofia Pachini and Michael P. Sigalas\***

*Laboratory of Applied Quantum Chemistry, Department of Chemistry, Aristotle*

*University of Thessaloniki, 54124 Thessaloniki, Greece*

**Supplementary Material**

**Table S1** Absolute (hartrees) and Zero Point Energies (kcal/mol) of *closo*-heteroboranes.

| Molecule                                                         | sym             | 6-311G++(d,p) |      |             |      | 3-21G++(d,p) |      |             |      |
|------------------------------------------------------------------|-----------------|---------------|------|-------------|------|--------------|------|-------------|------|
|                                                                  |                 | MP2           |      | B3LYP       |      | MP2          |      | B3LYP       |      |
|                                                                  |                 | E             | ZPE  | E           | ZPE  | E            | ZPE  | E           | ZPE  |
| P <sub>2</sub> (HB) <sub>3</sub>                                 | D <sub>3h</sub> | -757.81424    | 26.5 | -759.14039  | 25.6 | -754.13696   | 26.0 | -755.44438  | 25.7 |
| P <sub>2</sub> (HB) <sub>2</sub> CH <sub>2</sub> <sup>a</sup>    | C <sub>2v</sub> | -771.56491    | 33.7 | -772.93238  | 33.6 | -767.82566   | 33.9 | -769.17494  | 33.8 |
| P <sub>2</sub> (HB) <sub>2</sub> CH <sub>2</sub>                 | C <sub>s</sub>  | -771.59150    | 33.6 | -772.95228  | 33.9 | -767.84963   | 34.2 | -769.19267  | 33.9 |
| P <sub>2</sub> (HB) <sub>2</sub> SiH <sub>2</sub>                | C <sub>2v</sub> | -1022.63633   | 28.4 | -1024.38959 | 28.6 | -1017.63832  | 28.7 | -1019.36271 | 28.8 |
| P <sub>2</sub> (HB) <sub>2</sub> GeH <sub>2</sub>                | C <sub>2v</sub> | -2809.01692   | 27.3 | -2811.87851 | 27.2 | -2795.70752  | 27.5 | -2798.52710 | 27.6 |
| P <sub>2</sub> (HB) <sub>2</sub> SnH <sub>2</sub>                | C <sub>2v</sub> |               |      |             |      | -6726.92385  | 26.3 | -6730.65249 | 26.1 |
| P <sub>2</sub> (H <sub>2</sub> NB) <sub>3</sub>                  | D <sub>3h</sub> | -923.64680    | 61.2 | -925.41187  | 61.1 | -919.16017   | 61.0 | -920.90587  | 60.9 |
| P <sub>2</sub> (H <sub>2</sub> NB) <sub>2</sub> CH <sub>2</sub>  | C <sub>2v</sub> | -882.15709    | 58.7 | -883.81470  | 58.3 | -877.87653   | 58.4 | -879.51549  | 58.5 |
| P <sub>2</sub> (H <sub>2</sub> NB) <sub>2</sub> SiH <sub>2</sub> | C <sub>2v</sub> | -1133.21522   | 52.8 | -1135.25923 | 52.7 | -1127.67612  | 52.5 | -1129.69086 | 52.8 |
| P <sub>2</sub> (H <sub>2</sub> NB) <sub>2</sub> GeH <sub>2</sub> | C <sub>2v</sub> | -2919.59805   | 51.7 | -2922.75087 | 51.5 | -2905.74842  | 51.6 | -2908.85878 | 51.7 |
| P <sub>2</sub> (H <sub>2</sub> NB) <sub>2</sub> SnH <sub>2</sub> | C <sub>2v</sub> |               |      |             |      | -6836.96267  | 50.8 | -6840.98208 | 50.5 |

<sup>a</sup> Transition state at all levels (one imaginary frequency). All other structures are real minima.

**Table S2** Optimized at the MP2 and B3LYP levels bond lengths (Å) and angles (°) for P<sub>2</sub>(HB)<sub>3</sub> and P<sub>2</sub>(H<sub>2</sub>NB)<sub>3</sub> using the 6-311G++(d,p) and 3-21G++(d,p) basis sets.

|       | P <sub>2</sub> (HB) <sub>3</sub> |       |              |       | P <sub>2</sub> (H <sub>2</sub> NB) <sub>3</sub> |       |              |       | Exp <sup>a</sup> |
|-------|----------------------------------|-------|--------------|-------|-------------------------------------------------|-------|--------------|-------|------------------|
|       | 6-311G++(d,p)                    |       | 3-21G++(d,p) |       | 6-311G++(d,p)                                   |       | 3-21G++(d,p) |       |                  |
|       | MP2                              | B3LYP | MP2          | B3LYP | MP2                                             | B3LYP | MP2          | B3LYP |                  |
| B··B  | 1.863                            | 1.894 | 1.875        | 1.906 | 2.079                                           | 2.144 | 2.087        | 2.147 | 2.190            |
| B-P   | 1.914                            | 1.914 | 1.916        | 1.915 | 1.944                                           | 1.952 | 1.943        | 1.952 | 1.952            |
| B-H   | 1.185                            | 1.182 | 1.188        | 1.190 |                                                 |       |              |       |                  |
| B-N   |                                  |       |              |       | 1.406                                           | 1.400 | 1.414        | 1.409 | 1.400            |
| N-H   |                                  |       |              |       | 1.009                                           | 1.008 | 1.009        | 1.013 |                  |
| B-P-B | 58.2                             | 59.3  | 58.6         | 59.7  | 64.6                                            | 66.6  | 64.9         | 66.7  | 69.6             |
| P-B-P | 111.7                            | 110.3 | 111.2        | 109.8 | 103.7                                           | 101.3 | 103.4        | 101.2 | 97.5             |
| P-B-H | 124.2                            | 124.8 | 124.4        | 125.1 |                                                 |       |              |       |                  |
| B-B-H | 150.0                            | 150.0 | 150.0        | 150.0 |                                                 |       |              |       |                  |
| P-B-N |                                  |       |              |       | 128.1                                           | 129.3 | 128.3        | 129.4 | 131.2            |
| H-N-H |                                  |       |              |       | 114.4                                           | 114.0 | 114.6        | 114.1 |                  |

<sup>a</sup> Mean values for P<sub>2</sub>(<sup>i</sup>Pr<sub>2</sub>NB)<sub>2</sub>((Me<sub>3</sub>Si)<sub>2</sub>NB) and P<sub>2</sub>(tmpB)<sub>3</sub> (ref.34).

**Table S3** Optimized at the MP2 and B3LYP levels bond lengths (Å) and angles (°) for  $P_2(HB)_2EH_2$ , (E = C, Si, Ge) using the 6-311G++(d,p) basis set.

|            | $P_2(HB)_2CH_2$ ( $C_{2v}$ ) |       | $P_2(HB)_2CH_2$ ( $C_s$ ) <sup>a</sup> |       | $P_2(HB)_2SiH_2$ ( $C_{2v}$ ) |       | $P_2(HB)_2GeH_2$ ( $C_{2v}$ ) |       |
|------------|------------------------------|-------|----------------------------------------|-------|-------------------------------|-------|-------------------------------|-------|
|            | MP2                          | B3LYP | MP2                                    | B3LYP | MP2                           | B3LYP | MP2                           | B3LYP |
| B··B       | 1.971                        | 2.028 | 1.892                                  | 1.924 | 1.941                         | 1.991 | 1.946                         | 1.996 |
| B-P        | 1.922                        | 1.933 | 1.906                                  | 1.910 | 1.924                         | 1.933 | 1.931                         | 1.939 |
| E··B       | 2.243                        | 2.305 | 1.898                                  | 1.899 | 2.330                         | 2.386 | 2.445                         | 2.501 |
|            |                              |       | 1.717                                  | 1.730 |                               |       |                               |       |
|            |                              |       | 2.436                                  | 2.462 |                               |       |                               |       |
| E-P        | 1.942                        | 1.951 | 1.991                                  | 2.005 | 2.267                         | 2.279 | 2.361                         | 2.369 |
| B-H        | 1.190                        | 1.187 | 1.184                                  | 1.182 | 1.190                         | 1.187 | 1.191                         | 1.188 |
|            |                              |       | 1.190                                  | 1.187 |                               |       |                               |       |
| E-H        | 1.091                        | 1.088 | 1.091                                  | 1.089 | 1.476                         | 1.485 | 1.531                         | 1.537 |
|            |                              |       | 1.089                                  | 1.084 |                               |       |                               |       |
| B-P-B      | 61.7                         | 63.3  | 59.7                                   | 60.7  | 60.6                          | 62.0  | 60.5                          | 62.0  |
| E-P-B      | 70.9                         | 72.8  | 52.2                                   | 52.4  | 66.9                          | 68.4  | 68.6                          | 70.2  |
|            |                              |       | 77.5                                   | 78.1  |                               |       |                               |       |
| P-B-P      | 99.9                         | 97.6  | 104.2                                  | 103.7 | 111.0                         | 109.0 | 111.0                         | 108.9 |
|            |                              |       | 104.9                                  | 104.5 |                               |       |                               |       |
| P-E-P      | 98.5                         | 96.4  | 98.2                                   | 97.0  | 88.7                          | 87.3  | 84.8                          | 83.4  |
| B-E-B      | 52.1                         | 52.2  | 50.7                                   | 51.1  | 49.2                          | 49.3  | 46.9                          | 47.2  |
| P-B-H      | 130.0                        | 131.2 | 127.0                                  | 127.5 | 124.2                         | 125.2 | 124.0                         | 125.1 |
|            |                              |       | 126.6                                  | 126.7 |                               |       |                               |       |
| B-B-H      | 143.4                        | 142.4 | 156.0                                  | 155.2 | 145.1                         | 145.3 | 144.1                         | 144.0 |
|            |                              |       | 132.2                                  | 132.3 |                               |       |                               |       |
| H-E-H      | 111.1                        | 110.9 | 112.6                                  | 111.5 | 107.6                         | 107.8 | 111.5                         | 111.1 |
| $\alpha^b$ | 105.7                        | 105.6 | 108.8                                  | 110.5 | 125.8                         | 124.9 | 125.7                         | 124.5 |

<sup>a</sup> The second value for some geometrical parameters refers to B' (see Fig. 1). <sup>b</sup>  $\alpha$  is the angle between the two PEP planes.

**Table S4** Experimental and optimized at the MP2 and B3LYP levels bond lengths (Å) and angles (°) for  $P_2(H_2NB)_2EH_2$ , (E = C, Si, Ge) using the 6-311G++(d,p) basis set.

|            | $P_2(H_2NB)_2CH_2$ ( $C_{2v}$ ) |       | $P_2(H_2NB)_2SiH_2$ ( $C_{2v}$ ) |       |                  | $P_2(H_2NB)_2GeH_2$ ( $C_{2v}$ ) |       |                  |
|------------|---------------------------------|-------|----------------------------------|-------|------------------|----------------------------------|-------|------------------|
|            | MP2                             | B3LYP | MP2                              | B3LYP | Exp <sup>a</sup> | MP2                              | B3LYP | Exp <sup>b</sup> |
| B··B       | 2.071                           | 2.162 | 2.106                            | 2.183 | 2.24             | 2.117                            | 2.193 | 2.26             |
| B-P        | 1.947                           | 1.960 | 1.953                            | 1.967 | 1.98             | 1.958                            | 1.970 | 1.97             |
| E··B       | 2.350                           | 2.395 | 2.434                            | 2.496 | 2.52             | 2.541                            | 2.599 | 2.62             |
| E-P        | 1.920                           | 1.932 | 2.266                            | 2.280 | 2.24             | 2.359                            | 2.370 | 2.32             |
| B-N        | 1.396                           | 1.390 | 1.401                            | 1.394 | 1.38             | 1.401                            | 1.394 | 1.42             |
| E-H        | 1.093                           | 1.087 | 1.479                            | 1.487 |                  | 1.535                            | 1.540 |                  |
| N-H        | 1.010                           | 1.010 | 1.009                            | 1.009 |                  | 1.010                            | 1.009 |                  |
| B-P-B      | 64.2                            | 67.0  | 65.2                             | 67.4  | 68.7             | 65.5                             | 67.6  | 70.0             |
| E-P-B      | 74.8                            | 76.0  | 70.0                             | 71.6  | 73.0             | 71.4                             | 72.9  | 74.6             |
| P-B-P      | 94.3                            | 92.3  | 105.3                            | 102.8 | 100.0            | 105.3                            | 102.8 | 99.4             |
| P-E-P      | 96.1                            | 94.1  | 86.5                             | 84.8  | 85.2             | 82.6                             | 81.0  | 80.7             |
| B-E-B      | 52.3                            | 53.7  | 51.3                             | 51.9  | 52.6             | 49.2                             | 49.9  | 51.2             |
| P-B-N      | 132.8                           | 133.8 | 127.3                            | 128.5 | 129.8            | 127.2                            | 128.5 | 130.1            |
| B-B-N      | 141.0                           | 142.1 | 149.0                            | 149.6 | 151.3            | 148.5                            | 149.1 | 152.4            |
| H-E-H      | 110.0                           | 110.0 | 108.4                            | 108.3 |                  | 111.1                            | 110.5 |                  |
| H-N-H      | 114.4                           | 113.9 | 114.3                            | 113.9 |                  | 114.4                            | 113.9 |                  |
| $\alpha^c$ | 102.9                           | 105.6 | 125.4                            | 125.6 | 122.7            | 126.2                            | 126.3 | 124.9            |

<sup>a</sup> Mean values for  $P_2(^iPr_2NB)_2(SiPh_2)$  and  $P_2(tmpB)_2(SiPh_2)$  (ref. 11). <sup>b</sup> Mean values for  $P_2(tmpB)_2(GePh_2)$  (ref. 12).

<sup>c</sup>  $\alpha$  is the angle between the two PEP planes.

**Table S5** Optimized at the B3LYP level bond lengths (Å) and angles (°) for  $P_2(HB)_2SnH_2$  and  $P_2(H_2NB)_2SnH_2$  using the SDD effective core potential and basis set

|            | $P_2(HB)_2SnH_2$ | $P_2(H_2NB)_2SnH_2$ |
|------------|------------------|---------------------|
| B··B       | 2.043            | 2.205               |
| B-P        | 1.973            | 1.993               |
| Sn··B      | 2.703            | 2.721               |
| Sn-P       | 2.604            | 2.629               |
| B-H        | 1.186            |                     |
| B-N        |                  | 1.400               |
| N-H        |                  | 1.014               |
| Sn-H       | 1.729            | 1.717               |
| B-P-B      | 63.3             | 69.1                |
| Sn-P-B     | 71.5             | 73.5                |
| P-B-P      | 109.8            | 104.0               |
| P-Sn-P     | 83.5             | 74.3                |
| B-Sn-B     | 48.4             | 47.8                |
| P-B-H      | 125.6            |                     |
| P-B-N      |                  | 127.8               |
| B-B-H      | 143.9            |                     |
| B-B-N      |                  | 151.3               |
| H-Sn-H     | 111.8            | 111.6               |
| H-N-H      |                  | 115.6               |
| $\alpha^a$ | 128.9            | 134.1               |

<sup>a</sup>  $\alpha$  is the angle between the two PEP planes.
